# Supplementary material for: A Novel HPLC Method for Direct Detection of Nitric Oxide Scavengers from Complex Plant Matrices and Its Application to Aloysia triphylla Leaves
Source: MDPI journal article supplement (doi:10.3390/molecules23071574), 2018-06-28

# A novel HPLC method for direct detection of nitric oxide scavengers from complex plant matrices and its application to *Aloysia triphylla* leaves

Didier Fraisse <sup>1</sup>, Alexandra Degerine-Roussel <sup>1</sup>, Alexis Bred <sup>1</sup>, Samba Fama Ndoye <sup>2</sup>, Magali Vivier <sup>3</sup>, Catherine Felgines <sup>1</sup>, François Senejoux <sup>1\*</sup>

<sup>1</sup> Université Clermont Auvergne, INRA, UNH, F-63000 Clermont-Ferrand, France

<sup>2</sup> Laboratory of Organic and Therapeutic Chemistry, Faculty of Medicine, Pharmacy and Odontology (F.M.P.O.), Cheikh Anta Diop University (U.C.A.D.). PB 5005 Dakar-Fann, Sénégal.

<sup>3</sup> UMR IMoST 1240 Inserm, Université Clermont Auvergne, 63005 Clermont-Ferrand, France

\* Correspondence: francois.senejoux@uca.fr, Tel.: +33 4 73 17 80 33, fax number: +33 4 73 17 80 37

## List of Supporting Information

Figure S1: <sup>1</sup>H NMR spectrum of **4** in DMSO-d<sub>6</sub> (500 MHz).

Figure S2: <sup>13</sup>C NMR spectrum of **4** in DMSO-d<sub>6</sub> (125 MHz).

Figure S3: UV spectra of identified compounds (1-6).

Figure S1:  $^1\text{H}$  NMR spectrum of **4** in DMSO- $d_6$  (500 MHz).

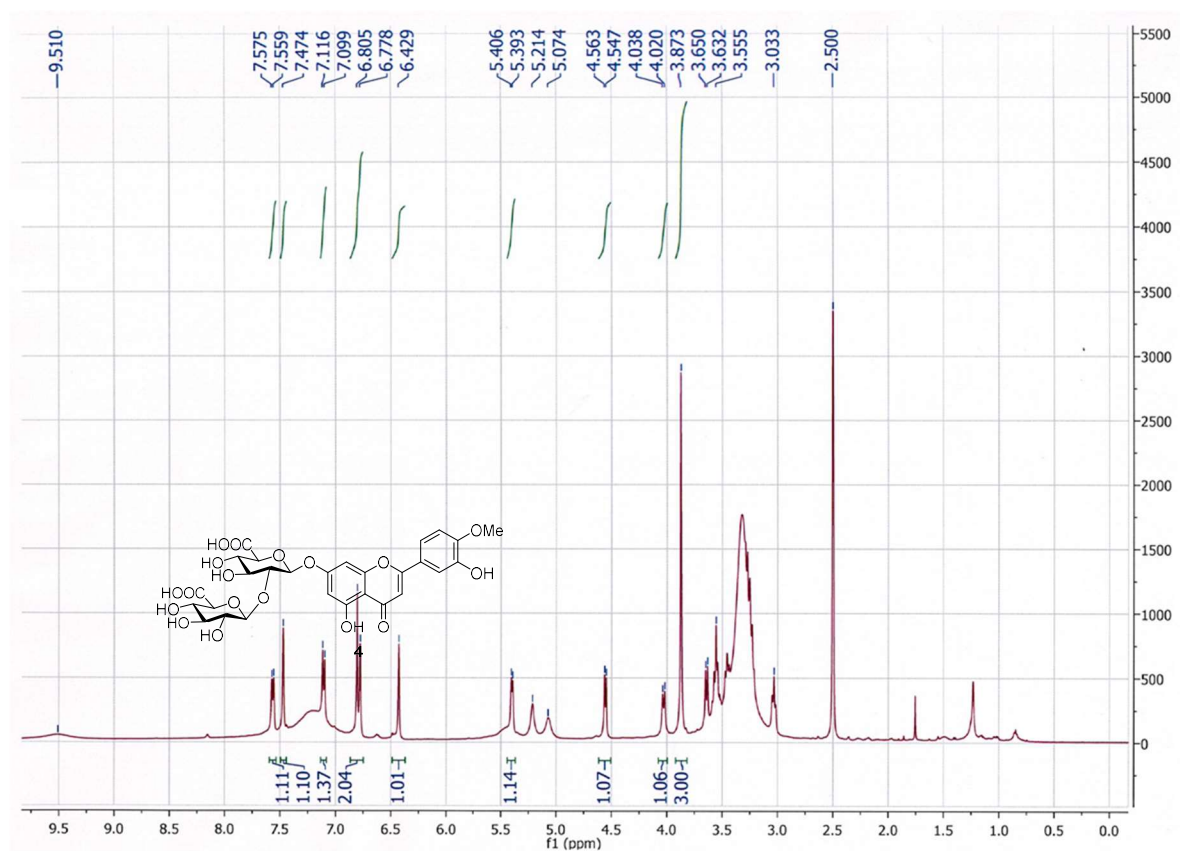

Figure S2:  $^{13}\text{C}$  NMR spectrum of **4** in DMSO- $d_6$  (125 MHz).

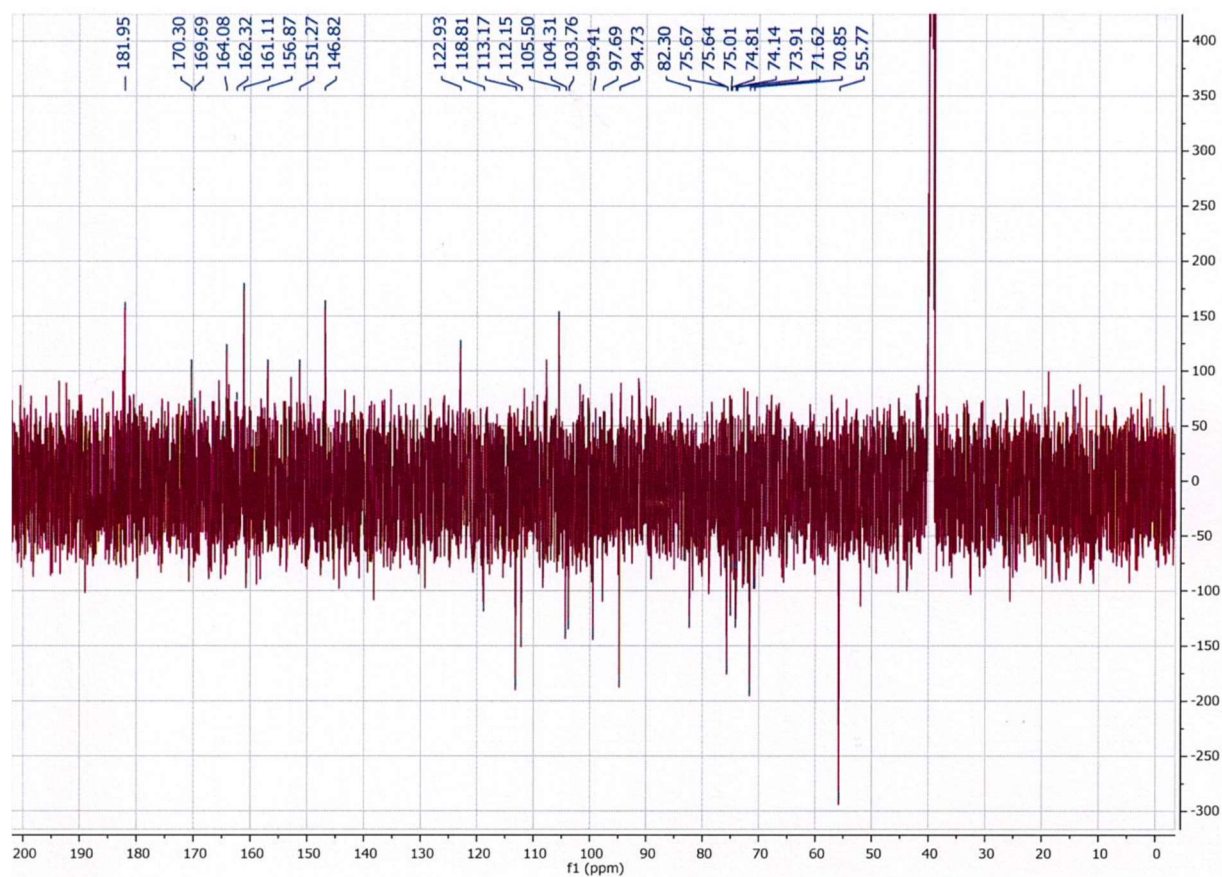

Figure S3: UV spectra of identified compounds (1-6).

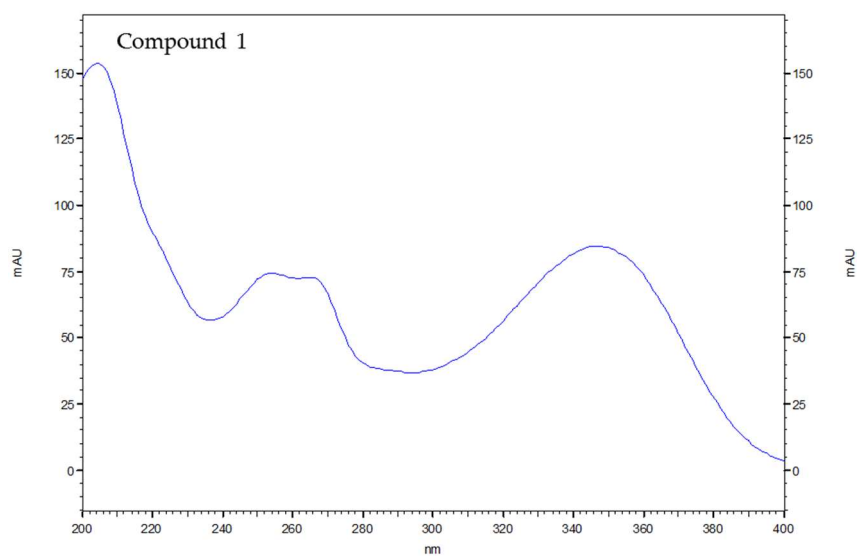

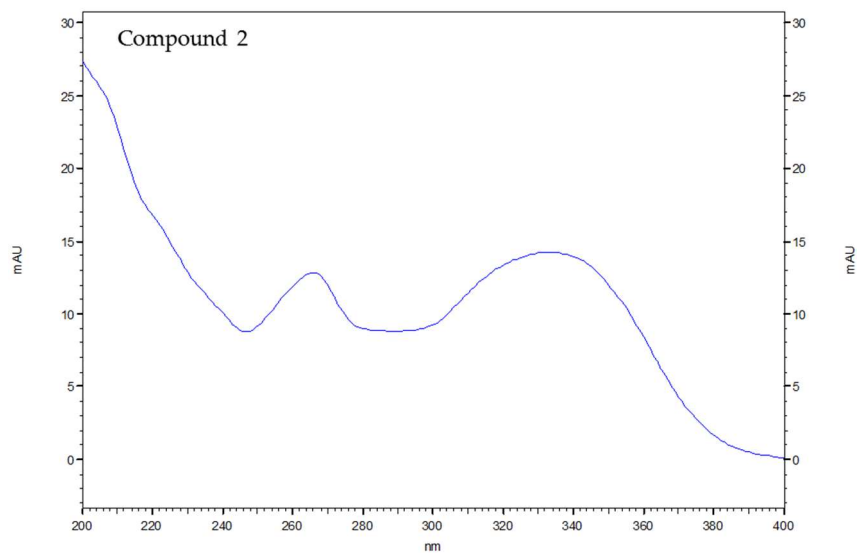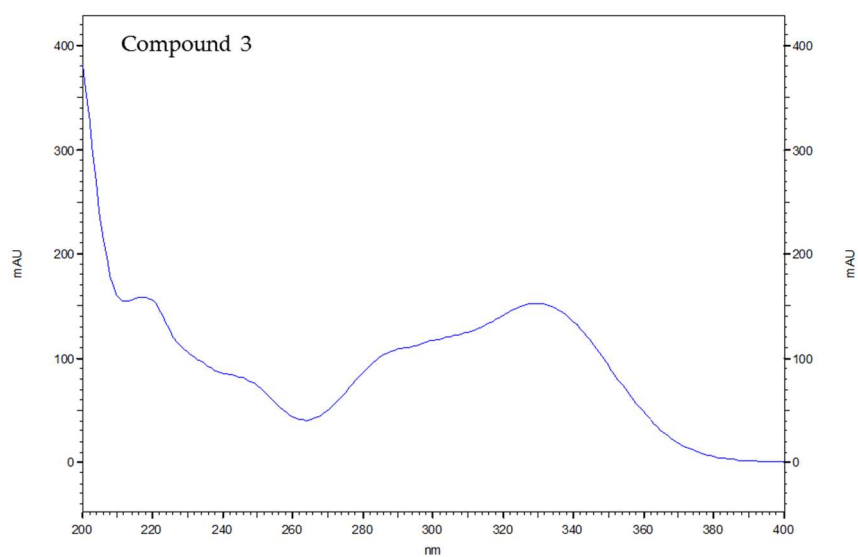

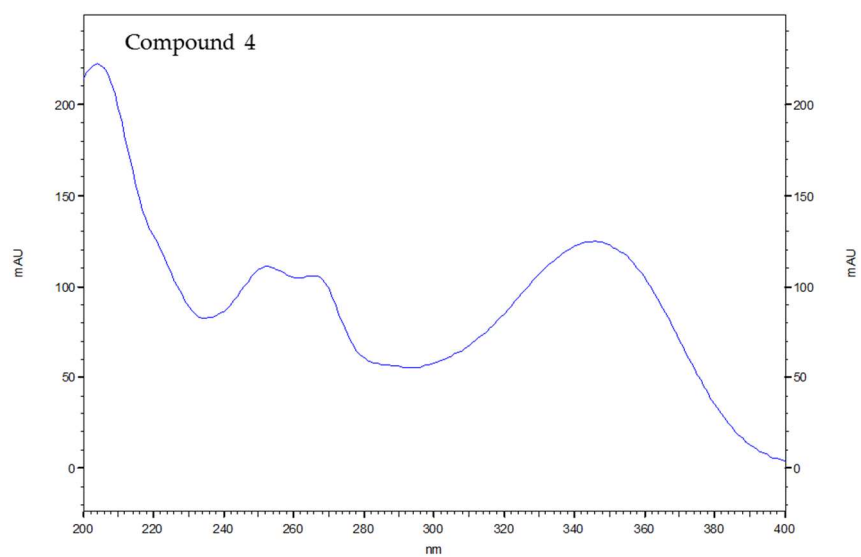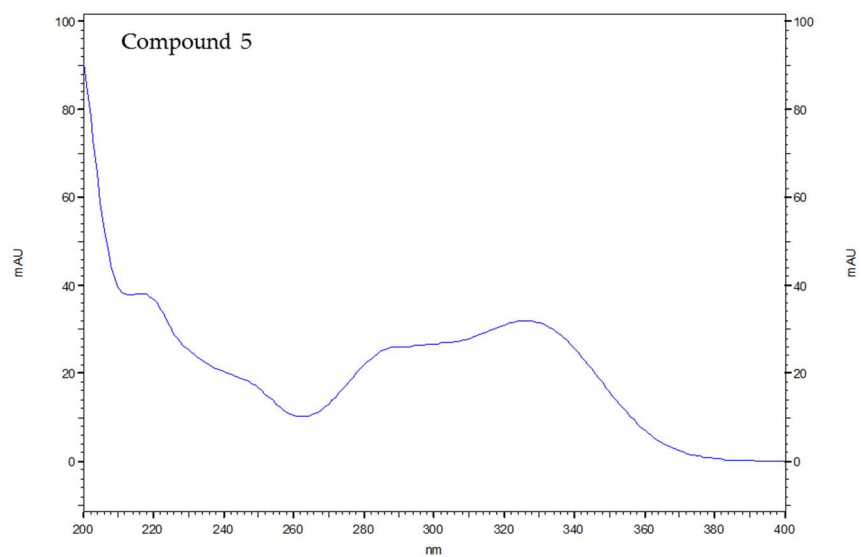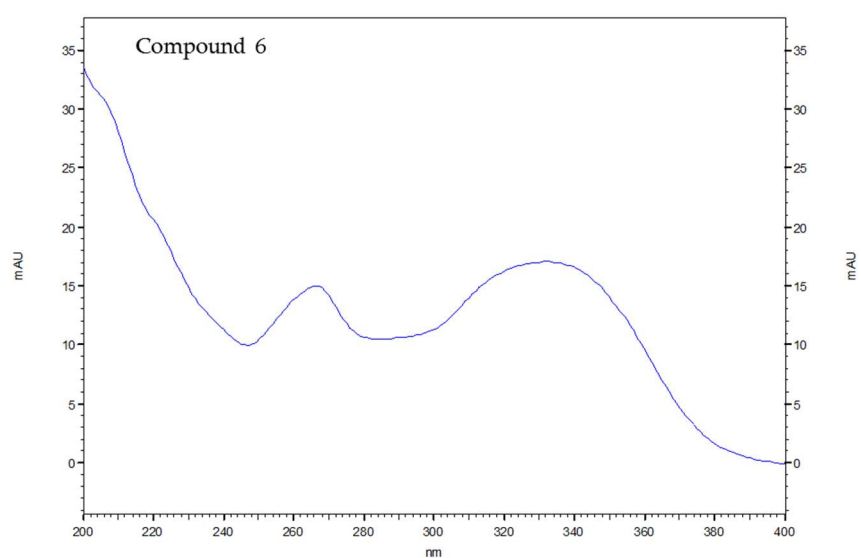

Supplement: s1 [file s1]
